# Supplementary material for: Somatic copy number profiling from hepatocellular carcinoma circulating tumor cells
Source: PubMed Central journal article supplement (PMC7331695; doi:10.1038/s41698-020-0123-0), 2020-07-02
Supplement: 41698_2020_123_MOESM1_ESM.pdf [file 41698_2020_123_MOESM1_ESM.pdf]

## Supplemental Figures and Tables

**Supplemental Table 1.** Clinical, Laboratory, Radiologic, Treatment and Pathologic Characteristics of the Patients (n = 10).

**Supplemental Table 2.** List of the 59 loci frequently amplified or lost in HCC as well as the associated study that reported the loci.

**Supplemental Table 3.** The 21 cancers grouped into 11 different cancer classes used in the final tumor origin classification model. The final model included 7002 individual samples from the 21 different cancer types.

**Supplemental Table 4.** List of the 31 cancer types included to create the SCNA-based classification model as well as the number of samples available for each cancer type.

**Supplemental Figure 1. (A)** STR analysis for patient H169 demonstrating that the CTC sample genotype does not match that of the primary tumor or blood. **(B)** Comparison of global copy number profiles for blood, peritumoral normal liver, CTCs, and primary tumor for patient H169.

**Supplemental Figure 2.** Array CGH of tumor and CTC samples for a subset of patients confirming the results of the NGS SCNA profiling.

**Supplemental Figure 3.** Spearman correlation matrix of CTC and primary tumor samples of the low-resolution whole genome sequencing copy number profiles for 250 kbp bins.

**Supplemental Figure 4. (A)** Principle component analysis of the whole blood, normal liver, primary tumor, and CTC (n = 7) samples for patient H195 revealed that most of the CTCs clustered closely with the primary tumor, while one CTC sample (CTC 7) clustered with the peritumoral normal and blood samples. **(B)** SCNA profiles for the primary tumor and all 7 CTC samples for patient H195. On examination of CTC 7's copy number profile, it clearly is closer to that of the germline DNA, and likely represents either a false positive CTC call or contamination. One additional CTC sample (CTC 4) clustered on its own, and examination of its copy number profile revealed significant discordance with all other samples as well. This finding is likely representative of problems during WGA or whole genome sequencing.

**Supplemental Figure 5.** t-SNE 2 dimensional plots for all samples from all cancer plotted for each cancer type alone on the entire t-SNE space. Some cancer types such as ESCA or BLCA demonstrate no clustering of patient samples while others such as TGCA or THCA demonstrate significant clustering.

**Supplemental Figure 6.** Cancer class prediction based on SCNA profile for each of the 29 lung CTC samples using the classification model. 23/29 (79%) of CTCs were correctly classified as being lung cancer while 6/29 (21%) were classified as being from

a liver source. 7/7 (100%) patients had at least one CTC classified as being from a lung tumor.

**Supplemental Figure 7.** Representative CTC images. **(A)** CTCs imaged on the silicon wire chip used for identification. **(B)** CTCs imaged on the PLGA chip used for laser microdissection. **(C)** Cells isolated by LMD are imaged on the cap to ensure complete isolation.

**Supplemental Table 1.** Clinical, Laboratory, Radiologic, Treatment and Pathologic Characteristics of the Patients (n = 10)

| <b>Characteristic</b>                   | <b>Data</b>     |
|-----------------------------------------|-----------------|
| <i>Clinical</i>                         |                 |
| Age, median (IQR)                       | 65 (60 – 73)    |
| Female, n (%)                           | 3 (30)          |
| Cirrhosis, n (%)                        | 9 (90)          |
| Diagnosis, n (%)*                       |                 |
| HCV                                     | 7 (70)          |
| HBV                                     | 3 (30)          |
| Cryptogenic                             | 1 (10)          |
| <i>Laboratory</i>                       |                 |
| Physiologic MELD, median (IQR)          | 7 (6 – 7)       |
| AFP, most recent, median (IQR)          | 4.3 (3.6 – 8.7) |
| AFP, maximum, median (IQR)              | 4.9 (3.9 – 9.3) |
| HCC CTC count, median (IQR)             | 4 (2 – 11)      |
| <i>Radiologic tumor characteristics</i> |                 |
| Tumor Location, n (%)                   |                 |
| Right Lobe                              | 5 (50)          |
| Left Lobe                               | 2 (20)          |
| Central                                 | 2 (20)          |
| Retroperitoneum**                       | 1 (10)          |
| Maximum tumor diameter, median (IQR)    | 5.3 (3.8 – 7.5) |
| <i>Pathologic Characteristics</i>       |                 |
| Tumor Diameter, median (IQR) ***        | 4.8 (3.6 – 7.9) |
| Microvascular invasion, n (%)***        | 5 (56)          |
| Macrovascular invasion, n (%)***        | 1 (11)          |
| PNI, n (%)***                           | 0 (0)           |
| Grade, n (%)                            |                 |
| Well                                    | 0 (0)           |
| Moderate                                | 6 (60)          |
| Poor                                    | 4 (40)          |

\* n = 1 patient with both HCV and HBV; \*\* n = 1, post-transplant recurrence undergoing retroperitoneal mass excision; \*\*\* n = 9 patients undergoing primary liver resection

**Supplemental Table 2.** List of the 59 loci frequently amplified or lost in HCC as well as the associated study that reported the loci.

| <b>Cytoband</b> | <b>Study</b>   | <b>Cytoband</b> | <b>Study</b>   |
|-----------------|----------------|-----------------|----------------|
| 11q13.3         | Schulze, 2016  | 6p22.3          | Kwon, 2013     |
| 12q22           | Kan, 2013      | 6p24.2          | Kwon, 2013     |
| 13q14.2         | Schulze, 2016  | 6p25.3          | Guichard, 2012 |
| 13q22.2         | Kan, 2013      | 7p12.2          | Guichard, 2012 |
| 13q33.1         | Kan, 2013      | 7p15.2          | Guichard, 2012 |
| 16p12.2         | Kan, 2013      | 7p21.1          | Guichard, 2012 |
| 16q13           | Kan, 2013      | 7q31.2          | Guichard, 2012 |
| 16q21           | Kan, 2013      | 7q36.1          | Woo, 2009      |
| 16q24.2         | Kan, 2013      | 8p11.21         | Roessler, 2012 |
| 17p11.1         | Kan, 2013      | 8p12            | Roessler, 2012 |
| 17p13.1         | Kan, 2013      | 8p21.2          | Roessler, 2012 |
| 17q21.2         | Kan, 2013      | 8p22            | Roessler, 2012 |
| 17q24.2         | Kan, 2013      | 8q12.3          | Kan, 2013      |
| 17q25.2         | Zhang, 2015    | 8q13.1          | Kan, 2013      |
| 1p12            | Guichard, 2012 | 8q21.11         | Kan, 2013      |
| 1p22.1          | Guichard, 2012 | 8q21.3          | Kan, 2013      |
| 1p33            | Guichard, 2012 | 8q22.1          | Kan, 2013      |
| 1p36.21         | Guichard, 2012 | 8q23.1          | Kan, 2013      |
| 1q21.3          | Woo, 2009      | 8q24.11         | Woo, 2009      |
| 1q22            | Woo, 2009      | 8q24.21         | Woo, 2009      |
| 1q42.11         | Woo, 2009      | 8q24.22         | Woo, 2009      |
| 20q12           | Kan, 2013      | 8q24.3          | Kan, 2013      |
| 20q13.12        | Li, 2016       | 9p21.3          | Guichard, 2012 |
| 20q13.2         | Dauch, 2016    | 9q32            | Guichard, 2012 |
| 21p11.2         | Kan, 2013      |                 |                |
| 22q13.1         | Kan, 2013      |                 |                |
| 3q26.31         | Guichard, 2012 |                 |                |
| 5p15.33         | Kan, 2013      |                 |                |
| 5p14.1          | Kan, 2013      |                 |                |
| 6p12.2          | Kan, 2013      |                 |                |
| 6p21.1          | Chiang, 2008   |                 |                |
| 6p21.2          | Chiang, 2008   |                 |                |
| 6p21.31         | Chiang, 2008   |                 |                |
| 6p21.32         | Guichard, 2012 |                 |                |
| 6p21.33         | Chiang, 2008   |                 |                |



**Supplemental Table 3.** The 21 cancers grouped into 11 different cancer classes used in the final tumor origin classification model. The final model included 7002 individual samples from the 21 different cancer types.

|                          |                                          |                                     |
|--------------------------|------------------------------------------|-------------------------------------|
| <b>ENDO</b><br>(ACC)     | <b>LIVER</b><br>(HCC, CHOL)              | <b>GI</b><br>(CRC, PDAC, STAD)      |
| <b>OV</b><br>(OV)        | <b>PCPG</b><br>(PCPG)                    | <b>KIDNEY</b><br>(KICH, KIRC, KIRP) |
| <b>MALE</b><br>(TGCT)    | <b>LUNG</b><br>(LUAD, LUSC)              | <b>NERVOUS</b><br>(GBM, LGG)        |
| <b>MELANOMA</b><br>(UVM) | <b>CNLOW</b><br>(THYM, LAML, THCA, PRAD) |                                     |

**Supplemental Table 4.** List of the 31 cancer types included to create the SCNA-based classification model as well as the number of samples available for each cancer type.

| <b>Abbreviation</b> | <b>Cancer Type</b>                                                  | <b>Samples</b> |
|---------------------|---------------------------------------------------------------------|----------------|
| BRCA                | Breast invasive carcinoma                                           | 1080           |
| COADREAD            | Colon and rectal adenocarcinoma                                     | 616            |
| OV                  | ovarian serous cystadenocarcinoma                                   | 579            |
| GBM                 | glioblastoma multiforme                                             | 577            |
| UCEC                | uterine corpus endometrial carcinoma                                | 539            |
| KIRC                | kidney renal clear cell carcinoma                                   | 528            |
| HNSC                | head and neck squamous cell carcinoma                               | 522            |
| LUAD                | lung adenocarcinoma                                                 | 516            |
| LGG                 | low grade glioma                                                    | 513            |
| LUSC                | lung squamous cell carcinoma                                        | 501            |
| THCA                | thyroid carcinoma                                                   | 499            |
| PRAD                | prostate adenocarcinoma                                             | 492            |
| STAD                | stomach adenocarcinoma                                              | 441            |
| BLCA                | bladder urothelial carcinoma                                        | 408            |
| LIHC                | liver hepatocellular carcinoma                                      | 370            |
| CESC                | cervical squamous cell carcinoma<br>and endocervical adenocarcinoma | 295            |
| KIRP                | kidney renal papillary cell carcinoma                               | 288            |
| SARC                | sarcoma                                                             | 257            |
| LAML                | acute myeloid leukemia                                              | 191            |
| ESCA                | esophageal carcinoma                                                | 184            |
| PAAD                | pancreatic adenocarcinoma                                           | 184            |
| PCPG                | pheochromocytoma and paraganglioma                                  | 162            |
| TGCT                | testicular germ cell tumors                                         | 150            |
| THYM                | thymoma                                                             | 123            |
| ACC                 | adrenocortical carcinoma                                            | 90             |
| MESO                | mesothelioma                                                        | 87             |
| UVM                 | uveal melanoma                                                      | 80             |
| KICH                | kidney chromophobe                                                  | 66             |
| UCS                 | uterine carcinosarcoma                                              | 56             |
| DLBC                | diffuse large b cell lymphoma                                       | 48             |
| CHOL                | choleangiocarcinoma                                                 | 36             |

**A.****Blood****Tumor****CTC**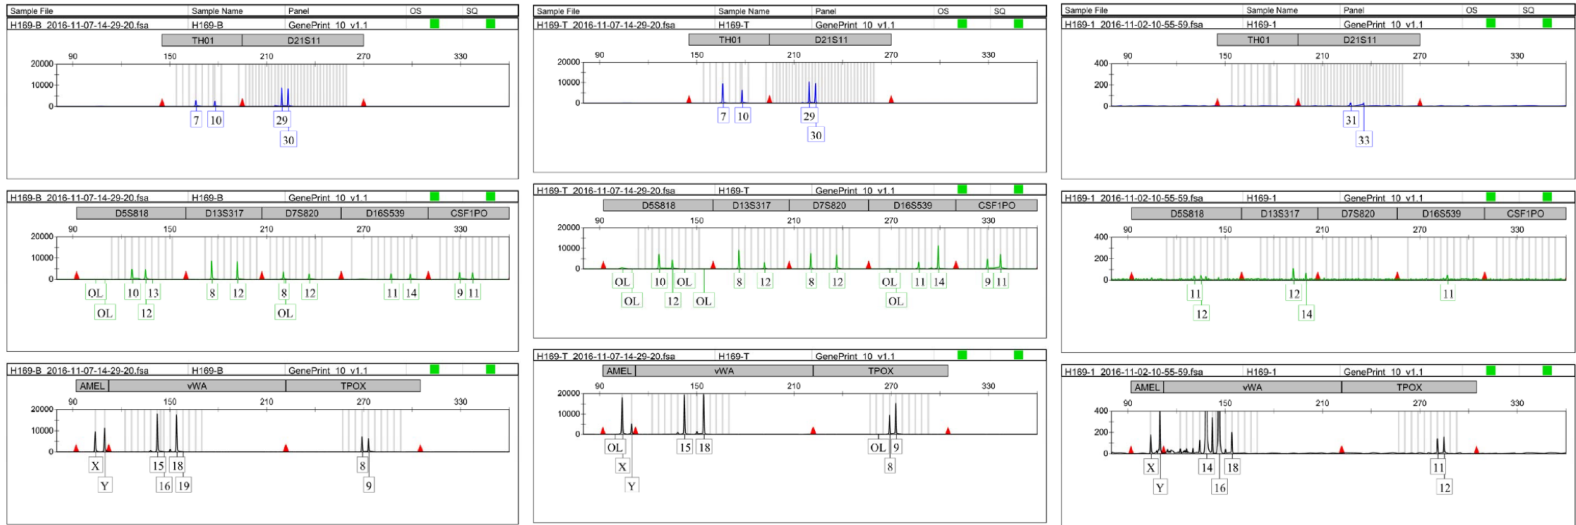**B.**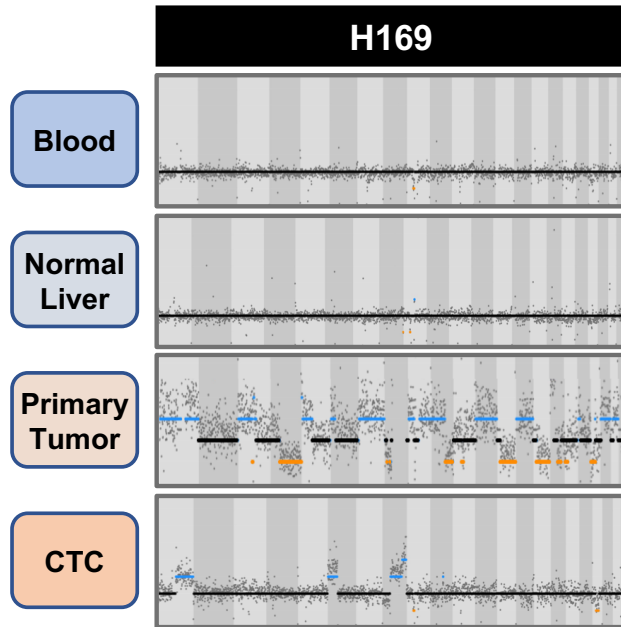

**Supplemental Figure 1. (A)** STR analysis for patient H169 demonstrating that the CTC sample genotype does not match that of the primary tumor or blood. **(B)** Comparison of global copy number profiles for blood, peritumoral normal liver, CTCs, and primary tumor for patient H169.

## H165

H165-1 DLRSD: 0.552 Signal/Noise: 53.8

CTC

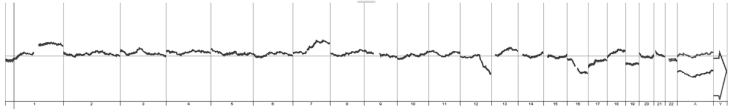

Primary Tumor

H165-T DLRSD: 0.559 Signal to Noise: 3.7928

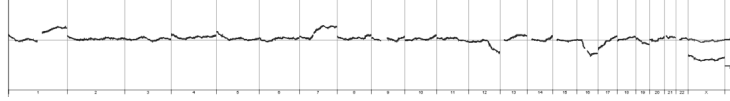

Whole Blood gDNA

H165-B DLRSD: 0.327 Signal to Noise: 4.862

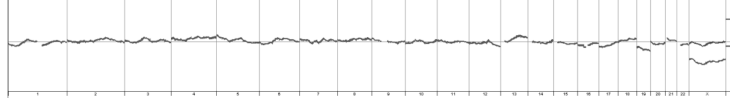

## H167

H167-1 DLRSD: 0.548 Signal/Noise: 48.0

CTC

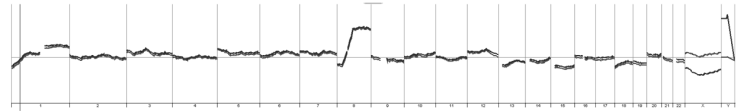

Primary Tumor

H167-T DLRSD: 0.511 Signal to Noise: 15.9651

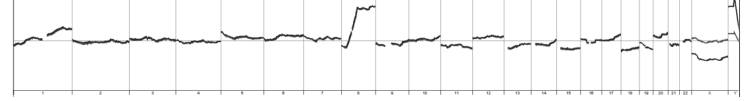

Whole Blood gDNA

H167-B DLRSD: 0.495 Signal to Noise: 17.8009

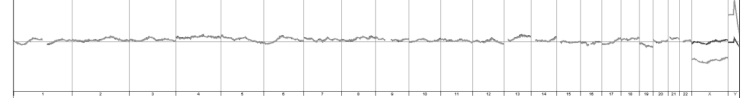

## H169

H169-1 DLRSD: 0.470 Signal/Noise: 51.6

CTC

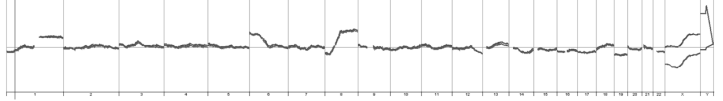

Primary Tumor

H169-T DLRSD: 0.499 Signal to Noise: 6.86261

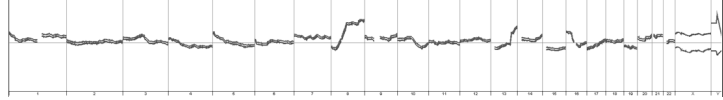

Whole Blood gDNA

H169-B DLRSD: 0.350 Signal to Noise: 3.41319

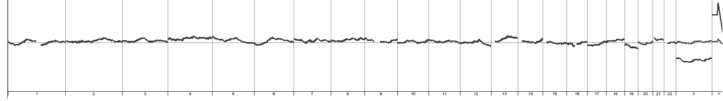

## H172

H172-2-CTC DLRSD: 0.443 Signal to Noise: 9.65089

CTC

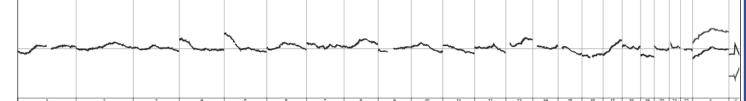

Primary Tumor

H172-T DLRSD: 0.519 Signal to Noise: 7.08468

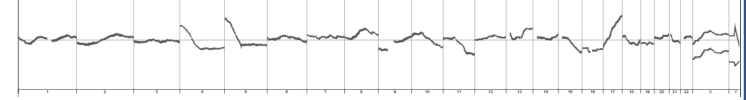

Whole Blood gDNA

H172-W DLRSD: 0.351 Signal to Noise: 3.05957

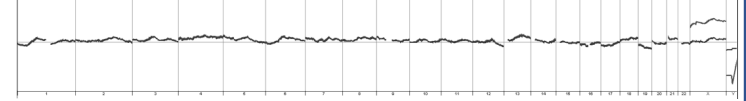

## H175

CTC

H175-CTC DLRSD: 0.561 Signal to Noise: 6.41815

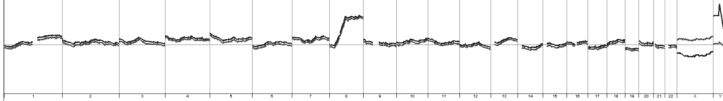

Primary Tumor

H175-T DLRSD: 0.567 Signal to Noise: 34.458

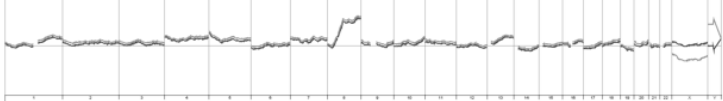

Whole Blood gDNA

H175-W DLRSD: 0.339 Signal to Noise: 27.716

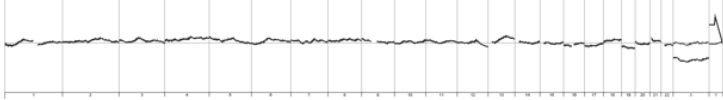

## H185

CTC

NGG-H185-2 DLRSD: 0.434 S/N: 9.84056

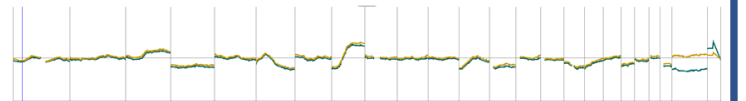

Primary Tumor

H185-T DLRSD: 0.622 Signal to Noise: 32.407

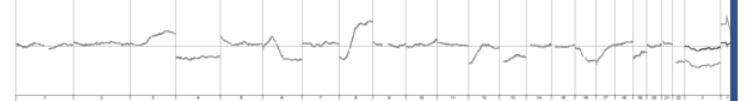

Whole Blood gDNA

H185-B DLRSD: 0.820 Signal to Noise: 14.770

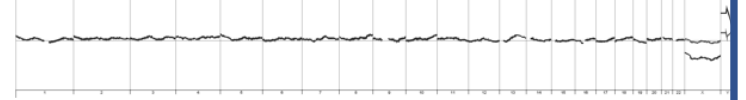

**Supplemental Figure 2.** Array CGH of tumor and CTC samples for a subset of patients confirming the results of the NGS CNV profiling.

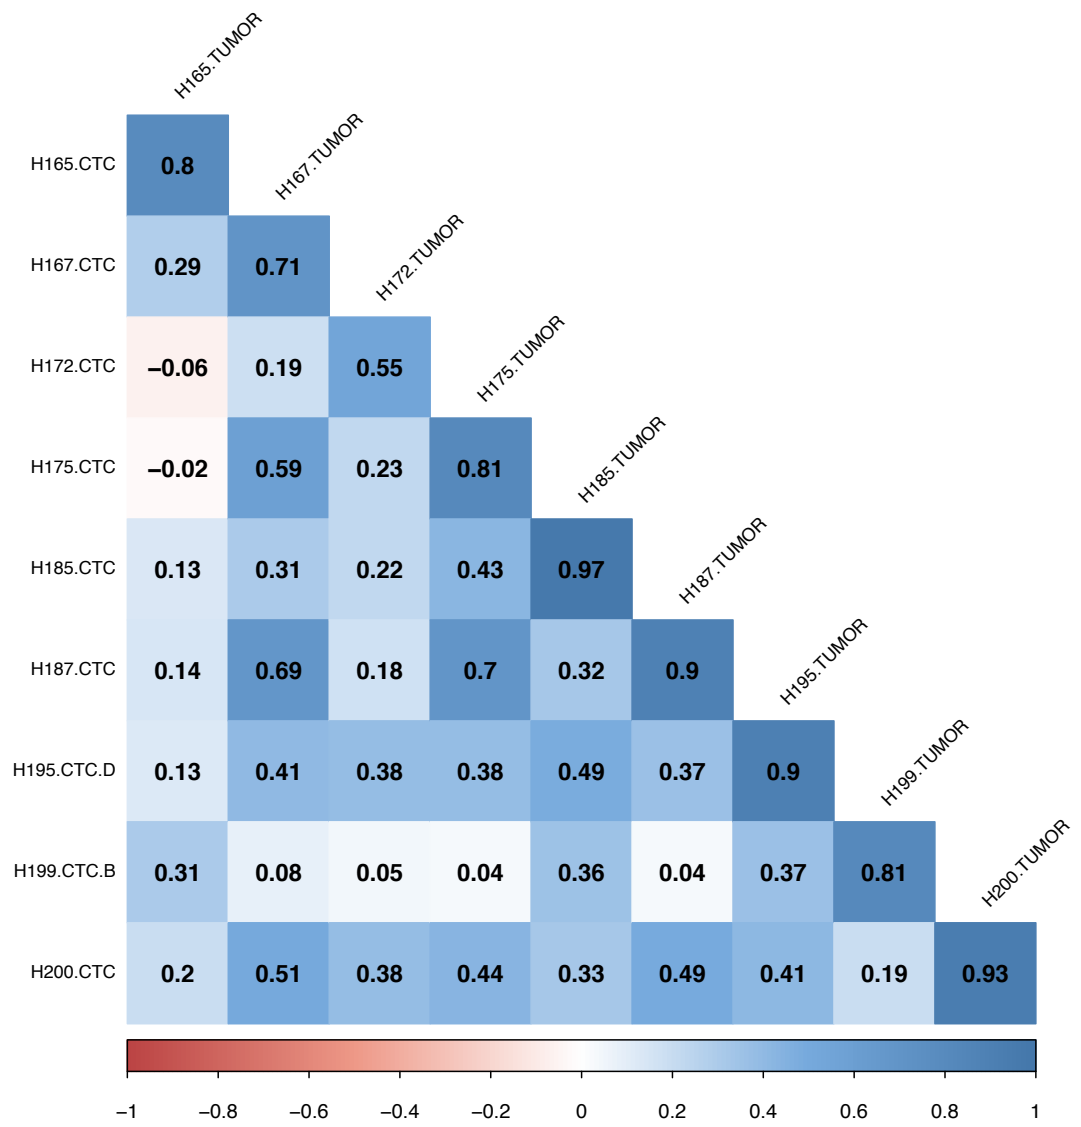

**Supplemental Figure 3.** Spearman correlation matrix of CTC and primary tumor samples of the low resolution whole genome sequencing copy number profiles for 250 kbp bins.

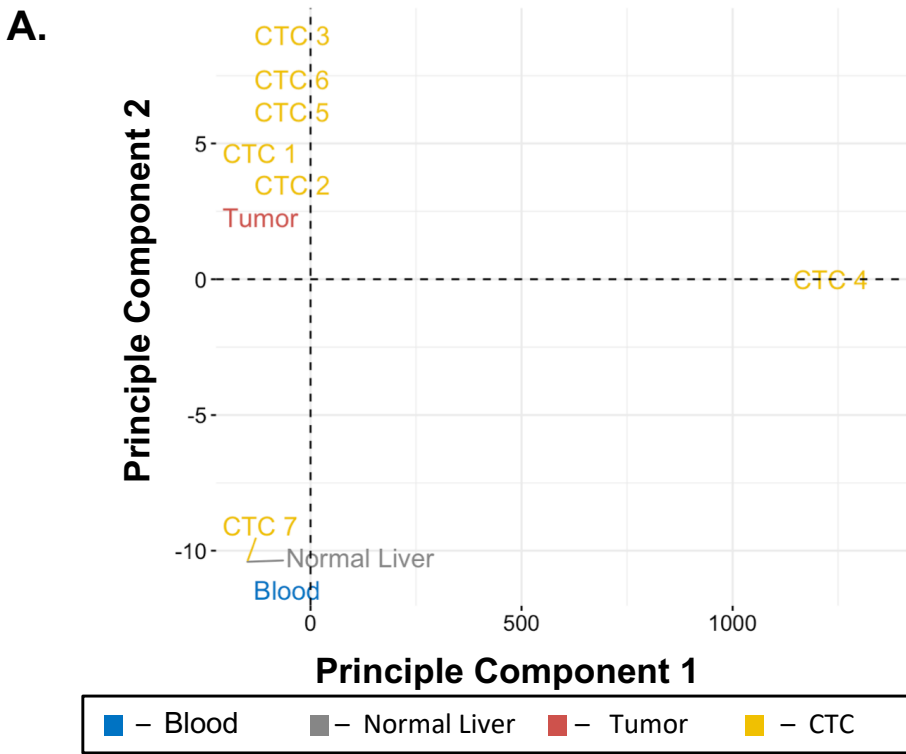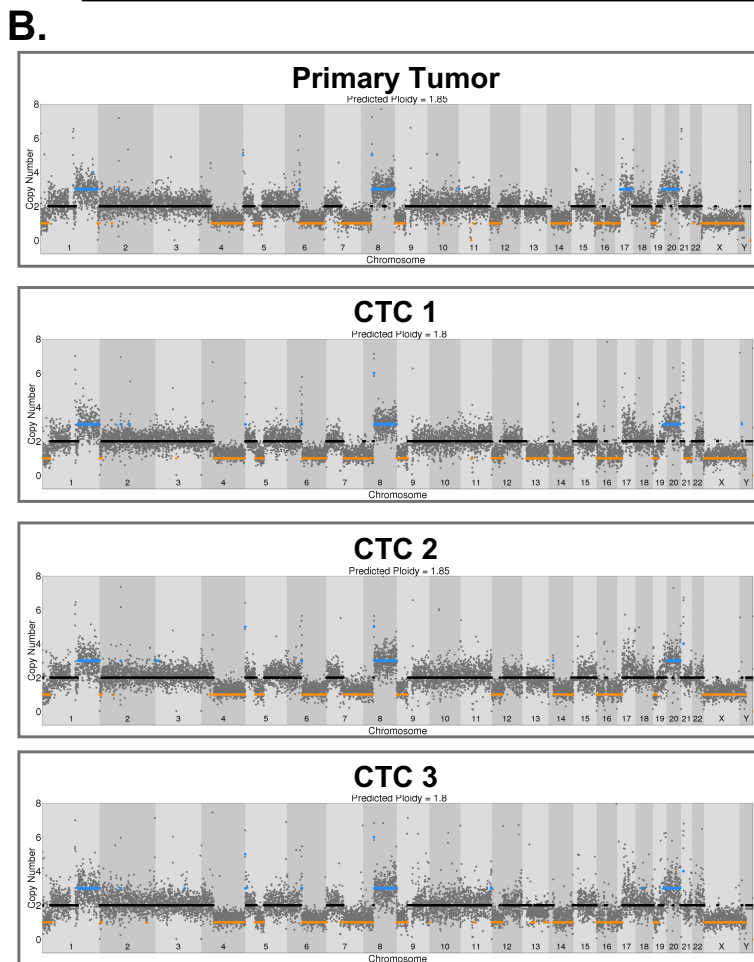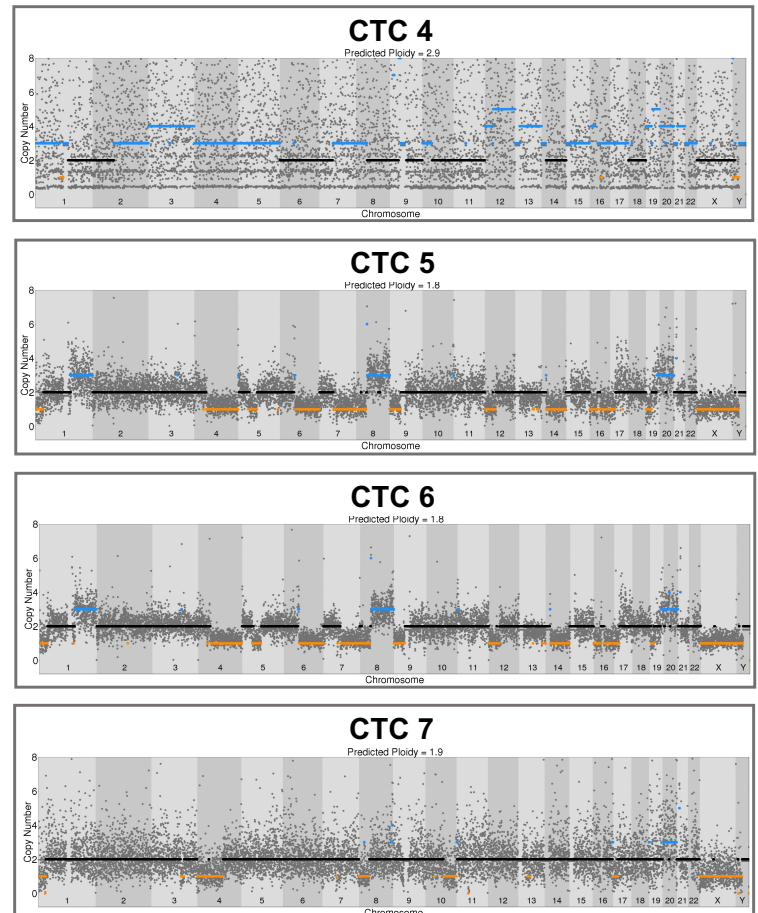

**Supplemental Figure 4. (A)** Principle component analysis of the whole blood, normal liver, primary tumor, and CTC ( $n = 7$ ) samples for patient H195 revealed that most of the CTCs clustered closely with the primary tumor, while one CTC sample (CTC 7) clustered with the peritumoral normal and blood samples. **(B)** SCNA profiles for the primary tumor and all 7 CTC samples for patient H195. On examination of CTC 7's copy number profile, it clearly is closer to that of the germline DNA, and likely represents either a false positive CTC call or contamination. One additional CTC sample (CTC 4) clustered on its own, and examination of its copy number profile revealed significant discordance with all other samples as well. This finding is likely representative of problems during WGA or whole genome sequencing.

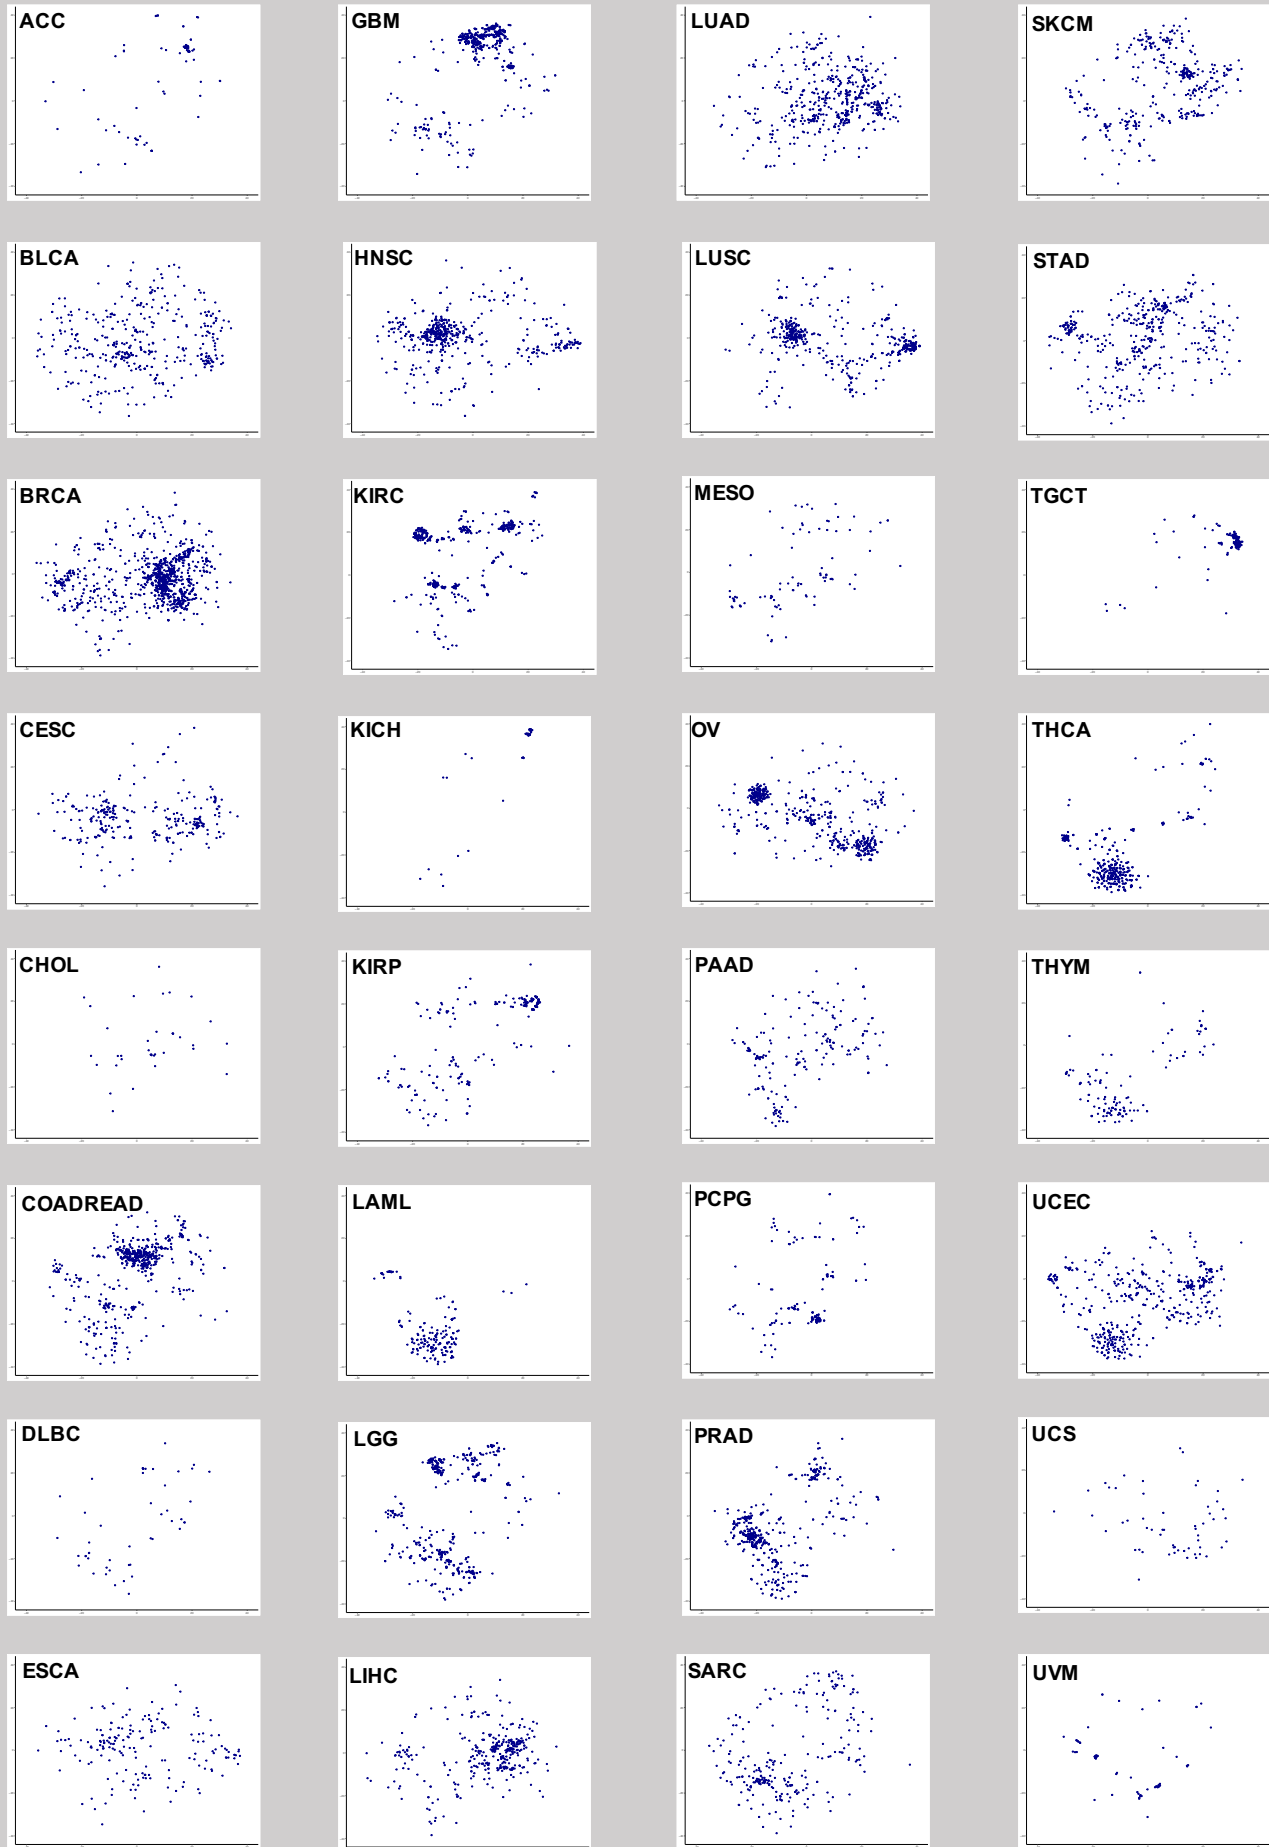

**Supplemental Figure 5.** t-SNE 2 dimensional plots for all samples from all cancer plotted for each cancer type alone on the entire t-SNE space. Some cancer types such as ESCA or BLCA demonstrate no clustering of patient samples while others such as TGCA or THCA demonstrate significant clustering.

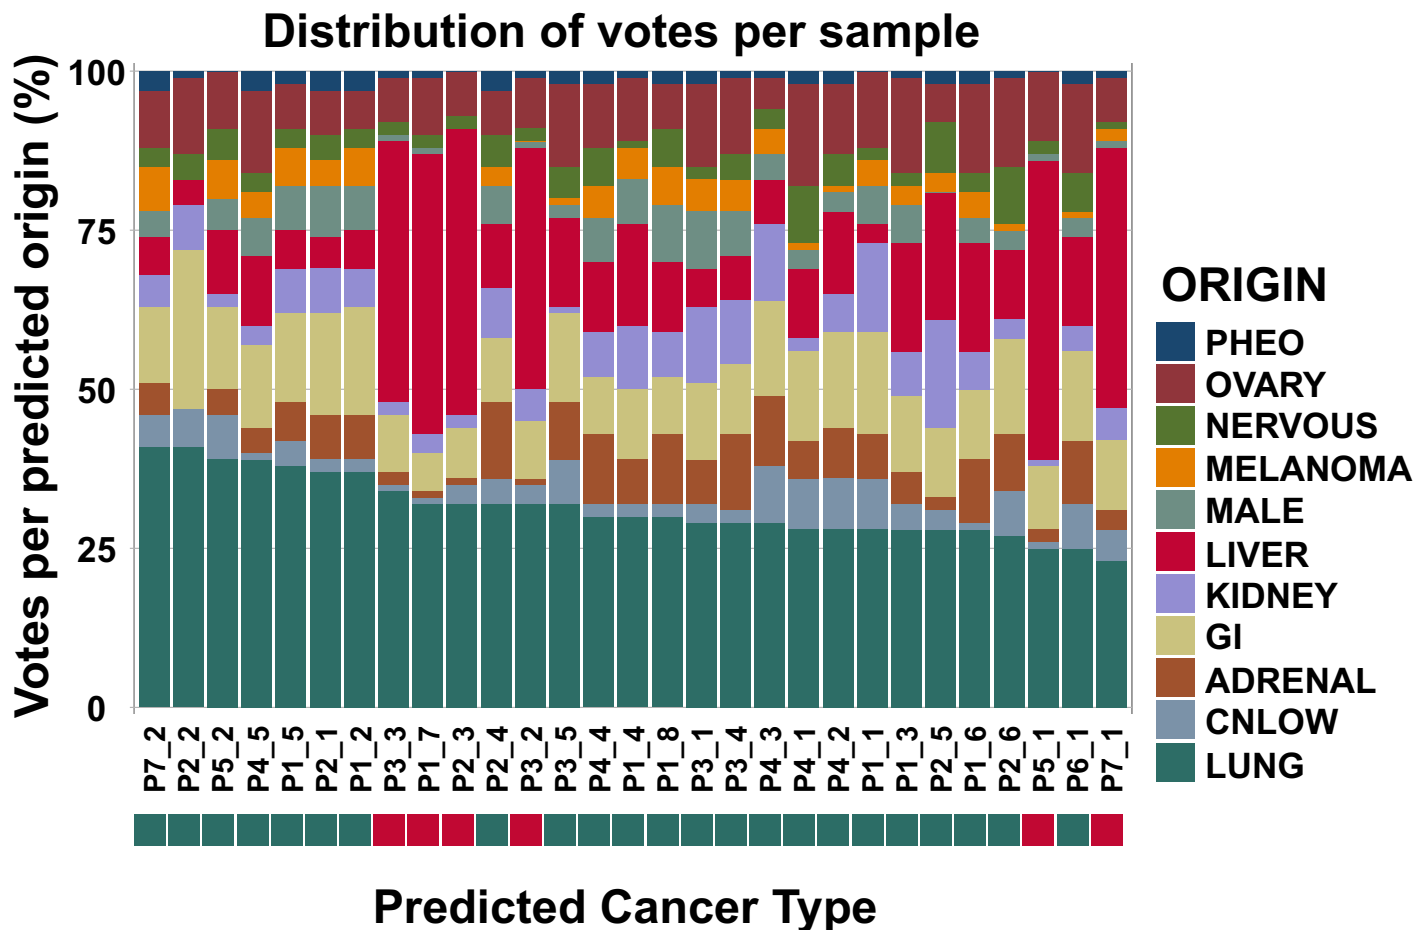

**Supplemental Figure 6.** Cancer class prediction based on SCNA profile for each of the 29 lung CTC samples using the classification model. 23/29 (79%) of CTCs were correctly classified as being lung cancer while 6/29 (21%) were classified as being from a liver source. 7/7 (100%) patients had at least one CTC classified as being from a lung tumor.



**A.**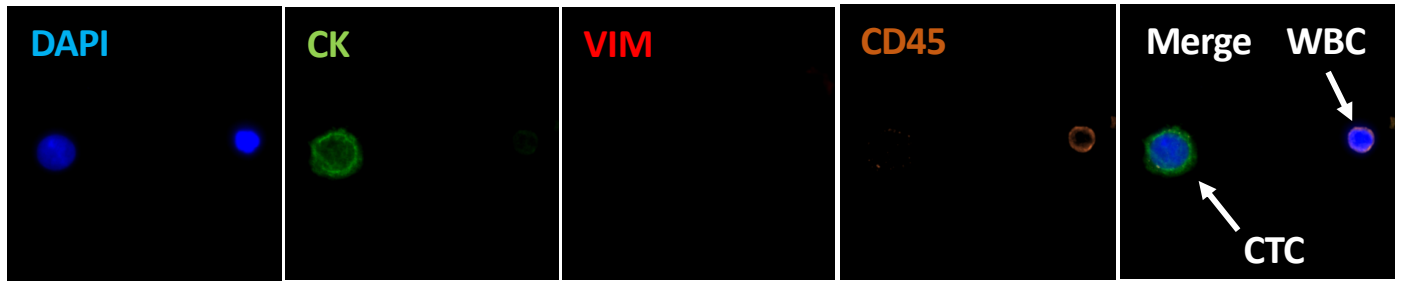**B.**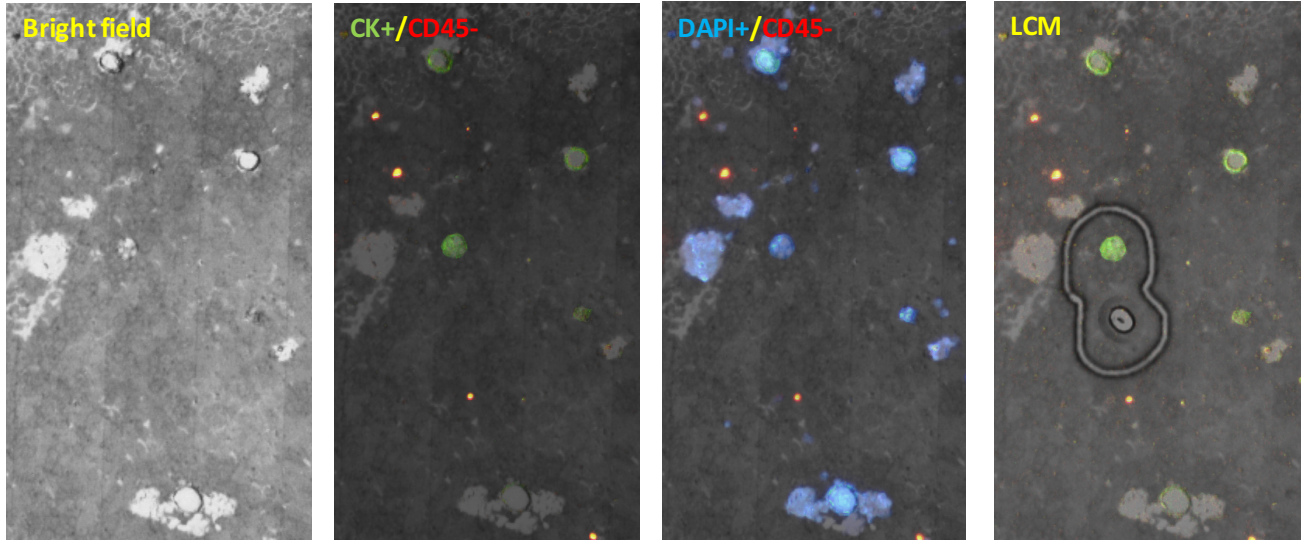**C.**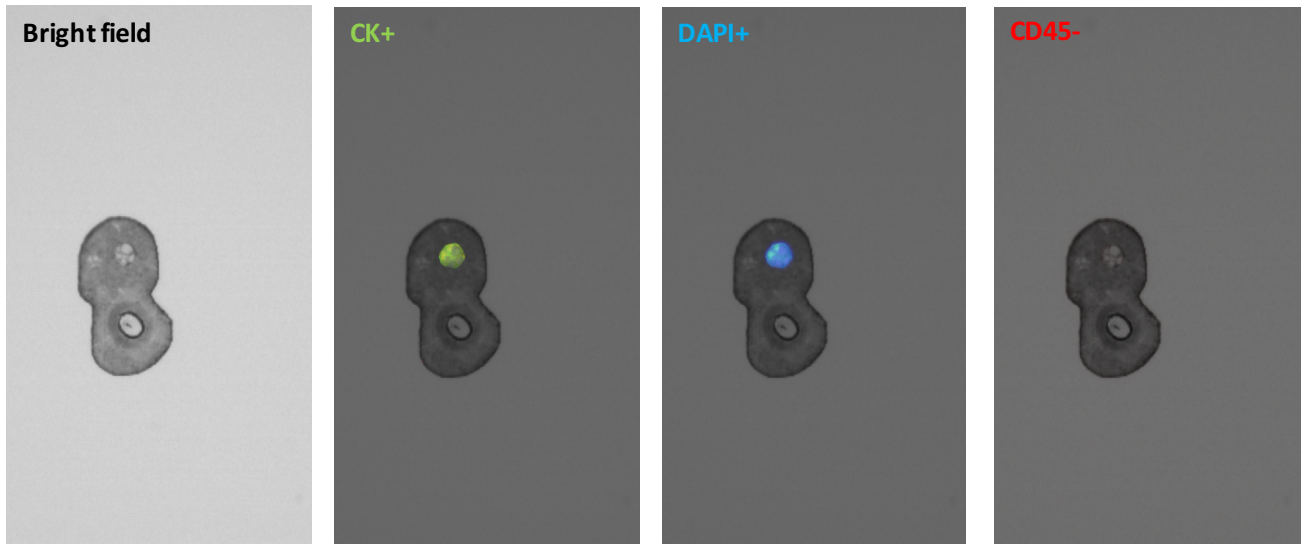

**Supplemental Figure 7.** Representative CTC images. **(A)** CTCs imaged on the silicon wire chip used for identification. **(B)** CTCs imaged on the PLGA chip used for laser microdissection. **(C)** Cells isolated by LMD are imaged on the cap to ensure complete isolation.
